# Supplementary material
Source: PubMed Central journal article supplement (PMC5418051)
Supplement: 10.1074_M117.775569_jbc.M117.775569-1.pdf [file 10.1074_M117.775569_jbc.M117.775569-1.pdf]

Supplementary material for:

A unique choanoflagellate enzyme rhodopsin with cyclic nucleotide phosphodiesterase activity

**Kazuho Yoshida<sup>1</sup>, Satoshi P. Tsunoda<sup>1,2,3</sup>, Leonid S. Brown<sup>4</sup>, Hideki Kandori<sup>1,3</sup>**

From

<sup>1</sup>Department of Life Science and Applied Chemistry, Nagoya Institute of Technology, Showa-ku, Nagoya 466-8555, Japan.

<sup>2</sup>JST PRESTO, 4-1-8 Honcho, Kawaguchi, Saitama, 332-0012, Japan

<sup>3</sup>OptoBioTechnology Research Center, Nagoya Institute of Technology, Showa-ku, Nagoya 466-8555, Japan.

<sup>4</sup>Department of Physics, University of Guelph, Guelph, Ontario N1G 2W1, Canada.

**Running title:** *Rhodopsin-PDE*

To whom correspondence should be addressed: Prof. Satoshi P. Tsunoda & Prof. Hideki Kandori

Address: Department of Life Science and Applied Chemistry, Nagoya Institute of Technology, Showa-ku, Nagoya 466-8555, Japan.

tel: +81 52 735 5218 & +81 52 735 5207

e-mail: [tsunoda.satoshi@nitech.ac.jp](mailto:tsunoda.satoshi@nitech.ac.jp) & [kandori@nitech.ac.jp](mailto:kandori@nitech.ac.jp)

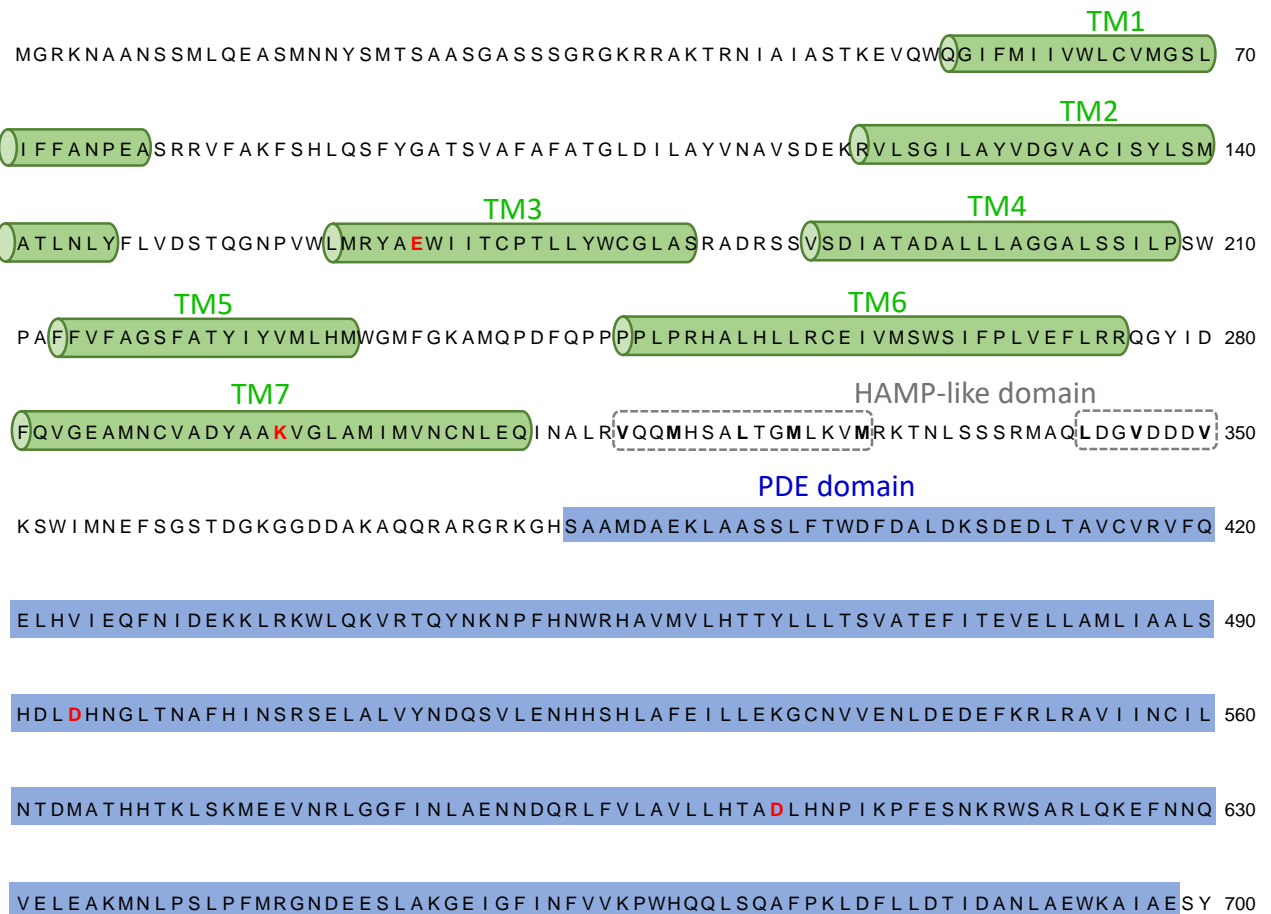

RQMH 704

Figure S1 , Amino acid sequence of Rhodopsin-PDE  
 7 transmembrane helices (TM1-7) in the rhodopsin domain are shown as green rods. Membrane topology was predicted based on the X-ray structure of BR after the sequence alignment. The HAMP-like domain is marked by gray dotted boxes. The PDE domain is shown in blue. Key functional residues in the rhodopsin and PDE domains are indicated in red. The repeats of hydrophobic residues, characteristic for HAMP domains, are shown in bold letters.



TM6

| No in Rh_PDE | 231 | 232 | 233 | 234 | 235 | 236 | 237 | 238 | 239 | 240 | 241 | 242 | 243 | 244 | 245 | 246 | 247 | 248 | 249 | 250 | 251 | 252 | 253 | 254 | 255 | 256 | 257 | 258 | 259 | 260 | 261 | 262 | 263 | 264 | 265 | 266 | 267 | 268 |   |   |   |   |
|--------------|-----|-----|-----|-----|-----|-----|-----|-----|-----|-----|-----|-----|-----|-----|-----|-----|-----|-----|-----|-----|-----|-----|-----|-----|-----|-----|-----|-----|-----|-----|-----|-----|-----|-----|-----|-----|-----|-----|---|---|---|---|
| No in BR     | 153 | 154 | 155 | 156 | 157 | 158 | 159 | 160 | 161 | 162 | 163 | 164 | 165 | 166 | 167 | 168 | 169 | 170 | 171 | 172 | 173 | 174 | 175 | 176 | 177 | 178 | 179 | 180 | 181 | 182 | 183 | 184 | 185 | 186 |     |     |     |     |   |   |   |   |
| Rh-PDE       | W   | G   | M   | F   | G   | K   | A   | M   | Q   | -   | -   | -   | -   | P   | D   | F   | Q   | P   | P   | P   | P   | L   | P   | R   | H   | A   | L   | H   | L   | L   | R   | C   | E   | I   | V   | M   | S   | W   | S | I | F | P |
| BR           | F   | F   | G   | F   | T   | S   | K   | -   | -   | -   | -   | -   | -   | A   | E   | S   | M   | R   | P   | E   | -   | -   | V   | A   | S   | T   | F   | K   | V   | L   | R   | N   | V   | T   | V   | V   | L   | W   | S | A | Y | P |
| HR           | L   | V   | Q   | W   | P   | -   | -   | -   | -   | -   | -   | -   | -   | A   | D   | A   | E   | A   | A   | G   | -   | -   | T   | S   | E   | I   | F   | G   | T   | L   | K   | I   | L   | T   | V   | V   | L   | W   | L | G | Y | P |
| KR2          | K   | K   | V   | I   | N   | E   | G   | -   | -   | -   | -   | -   | -   | K   | E   | G   | I   | S   | P   | A   | -   | -   | G   | Q   | K   | I   | L   | S   | N   | I   | W   | I   | L   | F   | L   | I   | S   | W   | T | L | Y | P |
| ChR2         | A   | K   | A   | Y   | I   | E   | -   | -   | -   | -   | -   | -   | -   | G   | Y   | H   | T   | V   | P   | K   | G   | R   | Q   | V   | V   | T   | G   | M   | A   | W   | L   | F   | F   | V   | S   | W   | G   | M   | F | P |   |   |
| ACR1         | F   | A   | I   | F   | A   | I   | T   | I   | H   | D   | F   | Q   | T   | I   | G   | S   | P   | M   | S   | L   | K   | -   | -   | V   | V   | E   | R   | L   | K   | L   | M   | R   | I   | V   | F   | V   | S   | W   | M | A | Y | P |
| SR11 NP      | V   | G   | P   | M   | T   | E   | S   | -   | -   | -   | -   | -   | -   | A   | S   | Q   | R   | S   | S   | G   | -   | -   | I   | K   | S   | L   | Y   | V   | R   | L   | R   | N   | L   | T   | V   | V   | L   | W   | A | I | Y | P |
| ASR          | W   | N   | P   | L   | R   | A   | K   | -   | -   | -   | -   | -   | -   | T   | R   | T   | Q   | S   | S   | E   | -   | -   | L   | A   | N   | L   | Y   | D   | K   | L   | V   | T   | Y   | F   | T   | V   | L   | W   | I | G | Y | P |
| Rh-GC        | W   | S   | C   | F   | T   | G   | A   | I   | D   | -   | -   | -   | -   | G   | E   | T   | Q   | C   | N   | V   | -   | -   | E   | K   | S   | G   | L   | R   | W   | I   | R   | F   | S   | T   | I   | T   | W   | S   | L | F | P |   |
| HKR1 CR      | W   | S   | M   | F   | H   | A   | S   | I   | -   | -   | -   | -   | -   | A   | E   | A   | R   | H   | D   | S   | -   | -   | S   | R   | V   | S   | L   | E   | V   | L   | R   | L   | F   | A   | V   | G   | L   | W   | F | T | F | P |

TM7

| No in Rh_PDE | 269 | 270 | 271 | 272 | 273 | 274 | 275 | 276 | 277 | 278 | 279 | 280 | 281 | 282 | 283 | 284 | 285 | 286 | 287 | 288 | 289 | 290 | 291 | 292 | 293 | 294 | 295 | 296 | 297 | 298 | 299 | 300 | 301 | 302 |     |     |   |   |   |   |   |   |   |   |   |
|--------------|-----|-----|-----|-----|-----|-----|-----|-----|-----|-----|-----|-----|-----|-----|-----|-----|-----|-----|-----|-----|-----|-----|-----|-----|-----|-----|-----|-----|-----|-----|-----|-----|-----|-----|-----|-----|---|---|---|---|---|---|---|---|---|
| No in BR     | 187 | 188 | 189 | 190 | 191 | 192 | 193 | 194 | 195 | 196 | 197 | 198 | 199 | 200 | 201 | 202 | 203 | 204 | 205 | 206 | 207 | 208 | 209 | 210 | 211 | 212 | 213 | 214 | 215 | 216 | 217 | 218 | 219 | 220 | 221 | 222 |   |   |   |   |   |   |   |   |   |
| Rh-PDE       | -   | L   | V   | E   | F   | L   | R   | R   | Q   | G   | -   | Y   | I   | D   | F   | Q   | V   | -   | -   | G   | E   | A   | M   | N   | C   | V   | A   | D   | Y   | A   | A   | K   | V   | G   | L   | A   | M | I | - | - | - | - | - |   |   |
| BR           | -   | V   | W   | L   | I   | G   | S   | E   | G   | A   | G   | I   | V   | P   | L   | N   | I   | -   | -   | E   | T   | L   | L   | F   | M   | V   | L   | D   | V   | S   | A   | K   | V   | G   | F   | G   | L | I | - | - | - | - | - |   |   |
| HR           | -   | I   | L   | W   | A   | L   | G   | S   | E   | G   | V   | A   | L   | L   | S   | V   | G   | V   | -   | -   | T   | S   | W   | G   | Y   | S   | G   | L   | D   | I   | L   | A   | K   | Y   | V   | F   | A | F | L | - | - | - | - | - |   |
| KR2          | L   | M   | P   | Y   | L   | T   | G   | V   | D   | G   | F   | L   | S   | E   | D   | G   | V   | M   | A   | R   | Q   | L   | V   | Y   | T   | I   | A   | D   | V   | S   | K   | V   | I   | Y   | G   | V   | L | - | - | - | - | - |   |   |   |
| ChR2         | -   | I   | L   | F   | I   | L   | G   | P   | E   | G   | F   | G   | V   | L   | S   | V   | Y   | G   | -   | -   | S   | T   | V   | G   | H   | T   | I   | D   | L   | M   | S   | K   | N   | C   | W   | G   | L | L | G | H | Y | L | R | V | L |
| ACR1         | -   | I   | L   | W   | S   | F   | S   | T   | G   | A   | C   | I   | M   | S   | E   | N   | T   | -   | -   | S   | S   | V   | L   | Y   | L   | L   | G   | D   | A   | L   | C   | K   | N   | T   | Y   | G   | I | L | - | - | - | - | - |   |   |
| SR11 NP      | -   | F   | I   | W   | L   | L   | G   | P   | T   | G   | V   | A   | L   | L   | T   | P   | T   | V   | -   | -   | D   | V   | A   | L   | I   | V   | Y   | L   | D   | L   | V   | T   | K   | V   | G   | F   | G | I | - | - | - | - | - |   |   |
| ASR          | -   | I   | V   | W   | I   | I   | G   | P   | S   | G   | F   | G   | W   | I   | N   | Q   | T   | I   | -   | -   | D   | T   | F   | L   | F   | C   | L   | L   | P   | F   | F   | S   | K   | V   | G   | F   | S | F | L | - | - | - | - | - |   |
| Rh-GC        | -   | I   | T   | W   | F   | S   | Y   | T   | S   | G   | -   | -   | L   | I   | S   | F   | T   | V   | -   | -   | A   | E   | A   | G   | F   | S   | M   | I   | D   | I   | G   | A   | K   | V   | F   | L   | T | L | V | - | - | - | - | - |   |
| HKR1 CR      | -   | V   | I   | W   | I   | V   | V   | K   | M   | G   | -   | -   | L   | V   | D   | I   | R   | T   | -   | -   | E   | E   | W   | T   | W   | C   | A   | C   | D   | F   | L   | G   | K   | V   | M   | F   | S | S | - | - | - | - | - |   |   |

| No in Rh_PDE | 303 | 304 | 305 | 306 | 307 | 308 | 309 | 310 | 311 | 312 | 313 | 314 | 315 | 316 | 317 | 318 | 319 | 320 | 321 | 322 | 323 | 324 | 325 |   |   |   |   |   |   |   |   |   |   |   |   |   |   |   |   |   |   |   |   |   |   |
|--------------|-----|-----|-----|-----|-----|-----|-----|-----|-----|-----|-----|-----|-----|-----|-----|-----|-----|-----|-----|-----|-----|-----|-----|---|---|---|---|---|---|---|---|---|---|---|---|---|---|---|---|---|---|---|---|---|---|
| No in BR     | 223 | 224 | 225 | 226 | 227 | 228 | 229 | 230 | 231 | 232 | 233 | 234 | 235 | 236 | 237 | 238 | 239 | 240 | 241 | 242 | 243 |     |     |   |   |   |   |   |   |   |   |   |   |   |   |   |   |   |   |   |   |   |   |   |   |
| Rh-PDE       | -   | -   | -   | -   | M   | V   | N   | C   | N   | L   | E   | Q   | I   | N   | A   | -   | -   | -   | -   | -   | -   | -   | -   | - |   |   |   |   |   |   |   |   |   |   |   |   |   |   |   |   |   |   |   |   |   |
| BR           | -   | -   | -   | -   | L   | L   | R   | S   | -   | -   | R   | A   | I   | F   | G   | -   | -   | -   | -   | -   | -   | -   | -   | - |   |   |   |   |   |   |   |   |   |   |   |   |   |   |   |   |   |   |   |   |   |
| HR           | -   | -   | -   | -   | L   | L   | R   | W   | -   | V   | A   | A   | N   | E   | G   | -   | -   | -   | -   | -   | -   | -   | -   | - |   |   |   |   |   |   |   |   |   |   |   |   |   |   |   |   |   |   |   |   |   |
| KR2          | -   | -   | -   | -   | L   | G   | N   | L   | A   | I   | T   | L   | S   | K   | N   | -   | -   | -   | -   | -   | -   | -   | -   | - |   |   |   |   |   |   |   |   |   |   |   |   |   |   |   |   |   |   |   |   |   |
| ChR2         | I   | H   | E   | H   | I   | L   | I   | H   | G   | D   | I   | R   | K   | T   | T   | K   | -   | -   | -   | -   | -   | -   | -   |   |   |   |   |   |   |   |   |   |   |   |   |   |   |   |   |   |   |   |   |   |   |
| ACR1         | -   | -   | -   | -   | L   | W   | A   | T   | T   | W   | G   | L   | L   | N   | G   | K   | W   | D   | R   | D   | Y   | V   | K   | G | R | N | V | D | G | T | L | M | P | E | Y | E | Q | D | L | E | K | G | N | T | E |
| SR11 NP      | -   | -   | -   | -   | A   | L   | D   | A   | -   | A   | A   | T   | L   | R   | A   | -   | -   | -   | -   | -   | -   | -   | -   | - | - |   |   |   |   |   |   |   |   |   |   |   |   |   |   |   |   |   |   |   |   |
| ASR          | -   | -   | -   | -   | D   | L   | H   | G   | -   | L   | R   | N   | L   | N   | D   | -   | -   | -   | -   | -   | -   | -   | -   | - | - |   |   |   |   |   |   |   |   |   |   |   |   |   |   |   |   |   |   |   |   |
| Rh-GC        | -   | -   | -   | -   | L   | V   | N   | S   | T   | V   | E   | Q   | A   | Q   | N   | -   | -   | -   | -   | -   | -   | -   | -   | - |   |   |   |   |   |   |   |   |   |   |   |   |   |   |   |   |   |   |   |   |   |
| HKR1 CR      | -   | -   | -   | -   | L   | L   | H   | G   | N   | F   | L   | T   | I   | E   | Q   | -   | -   | -   | -   | -   | -   | -   | -   | - |   |   |   |   |   |   |   |   |   |   |   |   |   |   |   |   |   |   |   |   |   |

| No in Rh_PDE | 526 | 527 | 528 | 529 | 530 | 531 | 532 | 533 | 534 | 535 | 536 | 537 | 538 | 539 | 540 |     |     |     |     |     |     |     |     |   |   |   |   |   |   |   |   |   |   |   |   |   |   |   |   |   |   |
|--------------|-----|-----|-----|-----|-----|-----|-----|-----|-----|-----|-----|-----|-----|-----|-----|-----|-----|-----|-----|-----|-----|-----|-----|---|---|---|---|---|---|---|---|---|---|---|---|---|---|---|---|---|---|
| No in BR     | 244 | 244 | 245 | 246 | 247 | 248 | 249 | 250 | 251 | 252 | 253 | 254 | 255 | 256 | 257 | 258 | 259 | 260 | 261 | 262 | 263 | 264 | 265 |   |   |   |   |   |   |   |   |   |   |   |   |   |   |   |   |   |   |
| Rh-PDE       | M   | L   | K   | V   | M   | R   | K   | T   | N   | L   | S   | S   | R   | M   | -   | -   | -   | -   | -   | -   | -   | -   | -   |   |   |   |   |   |   |   |   |   |   |   |   |   |   |   |   |   |   |
| BR           | A   | A   | A   | T   | S   | D   | -   | -   | -   | -   | -   | -   | -   | -   | -   | -   | -   | -   | -   | -   | -   | -   | -   |   |   |   |   |   |   |   |   |   |   |   |   |   |   |   |   |   |   |
| HR           | G   | A   | A   | P   | A   | D   | D   | -   | -   | -   | -   | -   | -   | -   | -   | -   | -   | -   | -   | -   | -   | -   | -   |   |   |   |   |   |   |   |   |   |   |   |   |   |   |   |   |   |   |
| KR2          | S   | -   | -   | -   | -   | -   | -   | -   | -   | -   | -   | -   | -   | -   | -   | -   | -   | -   | -   | -   | -   | -   | -   |   |   |   |   |   |   |   |   |   |   |   |   |   |   |   |   |   |   |
| ChR2         | V   | E   | D   | E   | A   | E   | A   | G   | A   | V   | P   | -   | -   | -   | -   | -   | -   | -   | -   | -   | -   | -   |     |   |   |   |   |   |   |   |   |   |   |   |   |   |   |   |   |   |   |
| ACR1         | R   | Y   | E   | D   | A   | R   | A   | G   | E   | T   | F   | E   | V   | K   | M   | F   | G   | R   | T   | L   | T   | S   | V   | R | R | S | R | - | - | - | - | - | - | - | - | - | - | - | - |   |   |
| SR11 NP      | T   | P   | A   | V   | A   | D   | -   | -   | -   | -   | -   | -   | -   | -   | -   | -   | -   | -   | -   | -   | -   | -   | -   |   |   |   |   |   |   |   |   |   |   |   |   |   |   |   |   |   |   |
| ASR          | T   | L   | Q   | F   | V   | E   | N   | I   | T   | L   | F   | A   | N   | S   | R   | R   | Q   | Q   | S   | R   | R   | V   | -   | - |   |   |   |   |   |   |   |   |   |   |   |   |   |   |   |   |   |
| Rh-GC        | L   | E   | N   | Q   | I   | N   | C   | D   | A   | I   | L   | Q   | K   | M   | M   | P   | E   | G   | V   | L   | E   | Q   | L   | K | N | G | Q | A |   |   |   |   |   |   |   |   |   |   |   |   |   |
| HKR1 CR      | L   | K   | D   | L   | V   | E   | Q   | K   | E   | R   | F   | M   | S   | S   | M   | S   | H   | E   | L   | R   | T   | P   | L   | N | G | - | - | - | - | - | - | - | - | - | - | - | - | - | - | - | - |

Figure S2 Amino acid sequence alignment of the rhodopsin domains of selected microbial rhodopsins

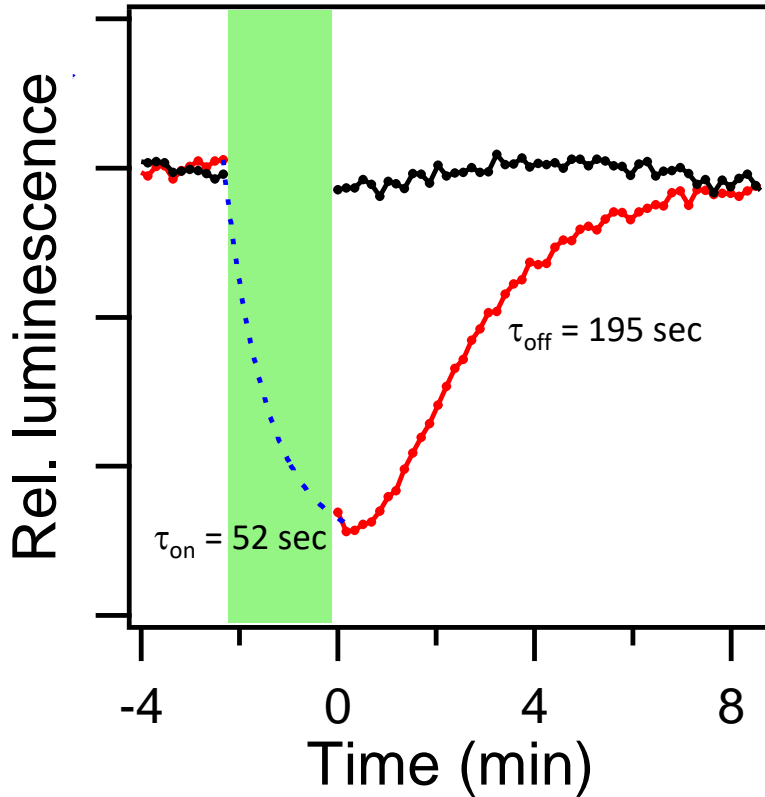

Figure S3 Estimation of the activated Rh-PDE lifetime

Signal decay during illumination (shown in light-green) represents degradation of cAMP by Rh-PDE, whereas the increase of the signal after shutting-off the light involves deactivation of Rh-PDE and production of cAMP by endogenous adenylyl cyclases. The decay and the recovery were fitted by a single exponential function to obtain  $\tau_{\text{on}}$  as 52 sec and  $\tau_{\text{off}}$  as 195 sec. Lifetime of Rh-PDE  $\tau_{\text{R}}$  was estimated as 71 sec by using the following equation.

$$1/\tau_{\text{R}} = 1/\tau_{\text{on}} - 1/\tau_{\text{off}}$$

## A, SDS-PAGE

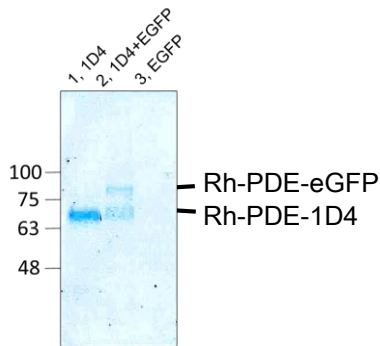

## B, unbound fraction

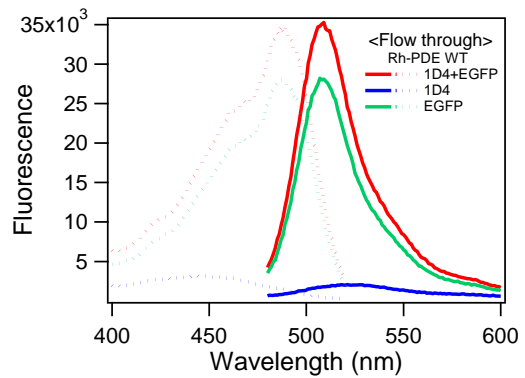

## C, elution

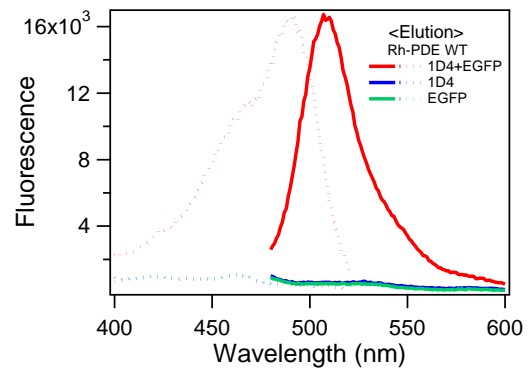

### Figure S4 Rh-PDE forms oligomers

1D4-tagged and eGFP-tagged Rh-PDE were cotransfected in HEK293 cells followed by purification by 1D4-resin. The eluted fraction contained both versions of Rh-PDE (A, lane 2). In contrast, only a single band is seen when only 1D4 tagged Rh-PDE is expressed (A, lane 1), and no protein was eluted from the cells transfected only the eGFP-tagged version (A, lane 3). B, Fluorescent spectra of the flow through solution after loading the solubilized protein on 1D4 resin. When the eGFP-tagged version is transfected, the flow through shows eGFP fluorescence, indicating the eGFP tagged Rh-PDE is not bound to the 1D4 resin. The data presented here indicate oligomeric assembly of Rh-PDE, at least in the solubilized form. Dotted curve; excitation spectra. Solid curve; emission spectra. C, Fluorescent spectra of the eluted proteins. eGFP fluorescence was observed only in the co-transfected cells, meaning eGFP-tagged Rh-PDE associates with 1D4-tagged Rh-PDE.
